# Supplementary material for: Serum Perfluorooctanoic Acid and Perfluorooctane Sulfonate Concentrations in Relation to Birth Outcomes in the Mid-Ohio Valley, 2005–2010
Source: PubMed Central journal article supplement (PMC3801459; doi:10.1289/ehp.1206372), 2013-07-09
Supplement: ehp.1206372.s001.pdf [file ehp.1206372.s001.pdf]

**Supplemental Material**

**Serum Perfluorooctanoic Acid and Perfluorooctane Sulfonate  
Concentrations in Relation to Birth Outcomes in the Mid-Ohio Valley,  
2005-2010**

Lyndsey A. Darrow, Cheryl R. Stein, Kyle Steenland

**Table of Contents:**

Supplemental Material Table S1. Adjusted Associations Between Model Covariates and  
Pregnancy Outcomes

Supplemental Material Table S2. Adjusted Associations from Sensitivity Analyses of Preterm  
Birth (<37 weeks)

Supplemental Material Table S3. Adjusted Associations from Sensitivity Analyses of Pregnancy-  
Induced Hypertension

Supplemental Material Table S4. Adjusted Associations from Sensitivity Analyses of Low Birth  
Weight (<2500 grams)

Supplemental Material Table S5. Adjusted Associations from Sensitivity Analyses of Birth  
Weight in Full-Term Infants

**Supplemental Material Table S1.** Adjusted<sup>a</sup> Associations Between Model Covariates and Pregnancy Outcomes

|                                           | <b>LBW</b>        | <b>PIH</b>        | <b>Preterm</b>    | <b>Term birth weight</b> |
|-------------------------------------------|-------------------|-------------------|-------------------|--------------------------|
|                                           | OR (95% CI)       | OR (95% CI)       | OR (95% CI)       | Δ in grams (95% CI)      |
| <b>Maternal age at conception (years)</b> |                   |                   |                   |                          |
| <30                                       | 1.0 (ref)         | 1.0 (ref)         | 1.0 (ref)         | 0 (ref)                  |
| 30-35                                     | 0.51 (0.24, 1.11) | 1.40 (0.84, 2.32) | 0.99 (0.63, 1.54) | 55 (-2, 112)             |
| 35+                                       | 1.85 (0.89, 3.84) | 0.96 (0.42, 2.18) | 1.48 (0.83, 2.64) | 22 (-65, 109)            |
| <b>Education (years)</b>                  |                   |                   |                   |                          |
| <12                                       | 1.39 (0.58, 3.30) | 1.36 (0.56, 3.31) | 1.05 (0.51, 2.15) | -173 (-272, -74)         |
| 12                                        | 1.0 (ref)         | 1.0 (ref)         | 1.0 (ref)         | 0 (ref)                  |
| 13-15                                     | 0.55 (0.33, 0.93) | 1.31 (0.78, 1.21) | 0.85 (0.56, 1.28) | 30 (-28, 87)             |
| 16+                                       | 0.44 (0.21, 0.90) | 0.85 (0.43, 1.68) | 0.49 (0.28, 0.87) | 84 (10, 157)             |
| <b>Body Mass index (BMI)</b>              |                   |                   |                   |                          |
| Underweight (<18.5)                       | 1.54 (0.63, 3.74) | 1.07 (0.24, 4.77) | 1.69 (0.75, 3.77) | -123 (-234, -12)         |
| Normal (18.5-<25)                         | 1.0 (ref)         | 1.0 (ref)         | 1.0 (ref)         | 0 (ref)                  |
| Overweight (25-<30)                       | 0.62 (0.35, 1.10) | 1.43 (0.81, 2.53) | 0.77 (0.49, 1.20) | 50 (-6, 107)             |
| Obese (>=30)                              | 0.47 (0.26, 0.84) | 2.61 (1.55, 4.39) | 0.76 (0.50, 1.15) | 112 (54, 171)            |
| <b>Parity</b>                             |                   |                   |                   |                          |
| 0                                         | 1.0               | 1.0               | 1.0               | 0                        |
| 1+                                        | 0.55 (0.35, 0.86) | 0.54 (0.36, 0.83) | 0.67 (0.48, 0.94) | 58 (16, 99)              |
| <b>Diabetes</b>                           | 1.13 (0.32, 3.93) | 2.16 (0.99, 4.68) | 2.97 (1.53, 5.78) | 98 (-23, 218)            |
| <b>Smoking status at conception</b>       |                   |                   |                   |                          |
| Never smoker                              | 1.0               | 1.0 (ref)         | 1.0 (ref)         | 0 (ref)                  |
| Former smoker                             | 0.95 (0.50, 1.82) | 0.85 (0.51, 1.42) | 0.70 (0.45, 1.10) | -29 (-88, 29)            |
| Current smoker                            | 1.89 (1.09, 3.24) | 0.92 (0.54, 1.55) | 0.84 (0.53, 1.31) | -183 (-243, -123)        |

<sup>a</sup> adjusted for all variables listed in Table

Supplemental Material Table S2. Adjusted<sup>a</sup> Associations from Sensitivity Analyses of Preterm Birth (<37 weeks)

| Model Variant                                                | N births | N cases | PFOA<br>OR (95% CI)<br>per ln increase | PFOS<br>OR (95% CI)<br>per ln increase |
|--------------------------------------------------------------|----------|---------|----------------------------------------|----------------------------------------|
| A. Primary model                                             | 1628     | 158     | 0.93 (0.78, 1.10)                      | 1.02 (0.78, 1.35)                      |
| B. PFOA and PFOS in same model                               | 1628     | 158     | 0.92 (0.77, 1.10)                      | 1.06 (0.79, 1.42)                      |
| C. Limit to nulliparous prospective pregnancies <sup>b</sup> | 318      | 34      | 1.06 (0.69, 1.63)                      | 0.65 (0.39, 1.08)                      |
| D. Excluding diabetics                                       | 1562     | 142     | 0.96 (0.81, 1.14)                      | 1.07 (0.80, 1.44)                      |
| E. For births in 2005, 2006, 2007                            | 1063     | 116     | 0.86 (0.70, 1.05)                      | 0.88 (0.65, 1.20)                      |
| F. Including term for birth year <sup>c</sup>                | 1628     | 158     | 0.94 (0.79, 1.11)                      | 1.03 (0.78, 1.36)                      |
| G. Control for BMI using cubic term                          | 1628     | 158     | 0.93 (0.79, 1.10)                      | 1.03 (0.78, 1.36)                      |
| H. Nulliparous (first births)                                | 570      | 66      | 0.85 (0.63, 1.14)                      | 0.83 (0.56, 1.25)                      |
| I. Parous (second and higher order births)                   | 1058     | 92      | 0.97 (0.80, 1.18)                      | 1.13 (0.74, 1.72)                      |

<sup>a</sup> unless otherwise specified, adjusted for maternal age (cubic terms), educational level (<12 years, 12, 13-15, 16+), smoking status (current, former, non), parity (0, 1+), BMI (underweight, normal, overweight, obese), self-reported diabetes, time between conception and serum measurement (year strata)

<sup>b</sup> conception occurred after serum measurement at enrollment

<sup>c</sup> including indicator terms for birth year instead of indicator terms for years since serum measurement

Supplemental Material Table S3. Adjusted<sup>a</sup> Associations from Sensitivity Analyses of Pregnancy-Induced Hypertension

| <b>Model Variant</b>                                         | <b>N births</b> | <b>N cases</b> | <b>PFOA<br/>OR (95% CI)<br/>per ln increase</b> | <b>PFOS<br/>OR (95% CI)<br/>per ln increase</b> |
|--------------------------------------------------------------|-----------------|----------------|-------------------------------------------------|-------------------------------------------------|
| A. Primary model                                             | 1600            | 106            | 1.27 (1.05, 1.55)                               | 1.47 (1.06, 2.04)                               |
| B. PFOA and PFOS in same model                               | 1600            | 106            | 1.22 (0.99, 1.51)                               | 1.34 (0.97, 1.87)                               |
| C. Limit to nulliparous prospective pregnancies <sup>b</sup> | 308             | 22             | 1.33 (0.87, 2.03)                               | 1.31 (0.72, 2.36)                               |
| D. Excluding diabetics                                       | 1535            | 95             | 1.36 (1.13, 1.64)                               | 1.61 (1.14, 2.27)                               |
| E. For births in 2005, 2006, 2007                            | 1045            | 64             | 1.35 (1.04, 1.76)                               | 1.17 (0.77, 1.78)                               |
| F. Including term for birth year <sup>c</sup>                | 1600            | 106            | 1.27 (1.05, 1.53)                               | 1.48 (1.07, 2.06)                               |
| G. Control for BMI using cubic term                          | 1600            | 106            | 1.27 (1.05, 1.54)                               | 1.42 (1.03, 1.96)                               |
| H. Nulliparous (first births)                                | 556             | 50             | 1.26 (0.94, 1.69)                               | 0.92 (0.64, 1.32)                               |
| I. Parous (second and higher order births)                   | 1044            | 56             | 1.26 (0.98, 1.62)                               | 2.23 (1.40, 3.54)                               |

<sup>a</sup> unless otherwise specified, adjusted for maternal age (cubic terms), educational level (<12 years, 12, 13-15, 16+), smoking status (current, former, non), parity (0, 1+), BMI (underweight, normal, overweight, obese), self-reported diabetes, time between conception and serum measurement (year strata)

<sup>b</sup> conception occurred after serum measurement at enrollment

<sup>c</sup> including indicator terms for birth year instead of indicator terms for years since serum measurement

Supplemental Material Table S4. Adjusted<sup>a</sup> Associations from Sensitivity Analyses of Low Birth Weight (<2500 grams)

| <b>Model Variant</b>                                         | <b>N births</b> | <b>N cases</b> | <b>PFOA<br/>OR (95% CI)<br/>per ln increase</b> | <b>PFOS<br/>OR (95% CI)<br/>per ln increase</b> |
|--------------------------------------------------------------|-----------------|----------------|-------------------------------------------------|-------------------------------------------------|
| A. Primary model                                             | 1629            | 88             | 0.94 (0.75, 1.17)                               | 1.12 (0.75, 1.67)                               |
| B. PFOA and PFOS in same model                               | 1629            | 88             | 0.91 (0.72, 1.16)                               | 1.16 (0.75, 1.79)                               |
| C. Limit to nulliparous prospective pregnancies <sup>b</sup> | 318             | 22             | 0.89 (0.51, 1.55)                               | 0.65 (0.39, 1.07)                               |
| D. Excluding diabetics                                       | 1563            | 84             | 0.97 (0.77,1.22)                                | 1.12 (0.74, 1.70)                               |
| E. For births in 2005, 2006, 2007                            | 1063            | 64             | 0.91 (0.70, 1.17)                               | 0.98 (0.64, 1.50)                               |
| F. Including term for birth year <sup>c</sup>                | 1629            | 88             | 0.93 (0.75, 1.16)                               | 1.14 (0.77, 1.70)                               |
| G. Control for BMI using cubic term                          | 1629            | 88             | 0.93 (0.75, 1.16)                               | 1.11 (0.75, 1.65)                               |
| H. Nulliparous (first births)                                | 570             | 41             | 0.92 (0.65, 1.31)                               | 1.05 (0.61, 1.78)                               |
| I. Parous (second and higher order births)                   | 1059            | 47             | 0.93 (0.71, 1.24)                               | 1.20 (0.59, 2.45)                               |

<sup>a</sup>unless otherwise specified, adjusted for maternal age (cubic terms), educational level (<12 years,12,13-15,16+), smoking status (current, former, non), parity (0,1+), BMI (underweight, normal, overweight, obese), self-reported diabetes, time between conception and serum measurement (year strata)

<sup>b</sup>conception occurred after serum measurement at enrollment

<sup>c</sup>including indicator terms for birth year instead of indicator terms for years since serum measurement

Supplemental Material Table S5. Adjusted<sup>a</sup> Associations from Sensitivity Analyses of Birth Weight in Full-Term Infants

| <b>Model Variant</b>                                         | <b>N births</b> | <b>PFOA<br/>Δ grams (95% CI)<br/>per ln increase</b> | <b>PFOS<br/>Δ grams (95% CI)<br/>per ln increase</b> |
|--------------------------------------------------------------|-----------------|------------------------------------------------------|------------------------------------------------------|
| A. Primary model                                             | 1470            | -8 (-28, 12)                                         | -29 (-66, 7)                                         |
| B. PFOA and PFOS in same model                               | 1470            | -4 (-25, 17)                                         | -27 (-65, 10)                                        |
| C. Limit to nulliparous prospective pregnancies <sup>b</sup> | 284             | -18 (-69, 32)                                        | -55 (-123, 14)                                       |
| D. Excluding diabetics                                       | 1420            | -6 (-26, 15)                                         | -25 (-61, 12)                                        |
| E. For births in 2005, 2006, 2007                            | 947             | -10 (-34, 14)                                        | -36 (-82, 9)                                         |
| F. Including term for birth year <sup>c</sup>                | 1470            | -7 (-27, 13)                                         | -28 (-65, 8)                                         |
| G. Control for BMI using cubic term                          | 1470            | -9 (-29, 11)                                         | -30 (-67, 6)                                         |
| H. Nulliparous (first births)                                | 504             | -4 (-42, 35)                                         | -48 (-105, 9)                                        |
| I. Parous (second and higher order births)                   | 966             | -3 (-25, 20)                                         | -14 (-58, 29)                                        |

<sup>a</sup> unless otherwise specified, adjusted for maternal age (cubic terms), educational level (<12 years, 12, 13-15, 16+), smoking status (current, former, non), parity (0, 1+), BMI (underweight, normal, overweight, obese), self-reported diabetes, time between conception and serum measurement (year strata)

<sup>b</sup> conception occurred after serum measurement at enrollment

<sup>c</sup> including indicator terms for birth year instead of indicator terms for years since serum measurement
